# Supplementary material for: A novel SHARPIN-PRMT5-H3R2me1 axis is essential for lung cancer cell invasion
Source: PubMed Central journal article supplement (PMC5589623; doi:10.18632/oncotarget.18957), 2017-07-04
Supplement: oncotarget-08-54809-s001.pdf [file oncotarget-08-54809-s001.pdf]

## A novel SHARPIN-PRMT5-H3R2me1 axis is essential for lung cancer cell invasion

### SUPPLEMENTARY MATERIALS

**Supplementary Table 1: Antibodies used in this study**

| Factor or PTM                                 | Vendor            | Cat Number | Dilution For blotting | Vol.for ChIP (μl) |
|-----------------------------------------------|-------------------|------------|-----------------------|-------------------|
| SHARPIN                                       | Abcam             | ab197853   | 1:5,000               |                   |
| PRMT5                                         | Millipore         | 07-405     | 1:5,000               | 10                |
| Vimentin                                      | Cell signaling    | 5741       | 1:3,000               |                   |
| Snail                                         | Cell signaling    | 3879       | 1:2,000               |                   |
| GAPDH                                         | Abcam             | ab9484     | 1:1,000               |                   |
| H3R2me1                                       | Abcam             | ab15584    | 1:5,000               | 8                 |
| H3R2me2s                                      | Abcam             | Ab194684   | 1:5,000               | 6                 |
| H3R8me2s                                      | Novus Biologicals | NB21-1063  | 1:5,000               | 10                |
| H4R3me1                                       | Novus Biologicals | NB21-2011  | 1:10,000              | 10                |
| H4R3me2a                                      | Active Motif      | 39705      | 1:10,000              | 8                 |
| H4R3me2s                                      | Abcam             | ab5823     | 1:10,000              | 3                 |
| H3K4me3                                       | abcam             | Ab8580     | 1:10,000              | 5                 |
| H3                                            | Abcam             | ab1791     | 1:100,000             | 4                 |
| HRP-conjugated anti-rabbit secondary antibody | GE                | NA834V     | 1:30,000              |                   |
| HRP-conjugated anti-mouse secondary antibody  | GE                | NA931V     | 1:30,000              |                   |

**Supplementary Table 2: RT-qPCR primers used in this study**

| Gene name | Forward sequence     | Reverse sequence     |
|-----------|----------------------|----------------------|
| ACTB      | AGCTACGAGCTGCCTGAC   | AAGGTAGTTTCGTGGATGC  |
| SHARPIN   | GCTATTGCAGGTGGAGACGA | GCCTCCTGAAGCTGAACACT |
| PRMT5     | TTGCCGGCTACTTTGAGACT | ACAGATGGTTTGGCCTTCAC |
| VIM       | CCCTCACCTGTGAAGTGGAT | GCTTCAACGGCAAAGTTCTC |
| CDH1      | CAAGTGCCTGCTTTTGATGA | GTTTTCTGTGCACACCTGGA |
| CDH2      | TGCTTCAACACGCTTTTGTT | TGGTCTCATCCCCAAGATA  |
| SNAI1     | GCTCCACAAGCACAAGAGT  | ATCCATGGCAGTGAGAAGG  |
| SNAI2     | GAGGAATCTGGCTGCTGTGT | GGTTGGTCAGCACAGGAGAA |

**Supplementary Table 3: ChIP primers used in this study**

| <b>Primer set name</b> | <b>Location in the genome</b> | <b>Forward sequence</b> | <b>Reverse sequence</b> |
|------------------------|-------------------------------|-------------------------|-------------------------|
| CDH1 -1 kb             | chr16:68735940+68736048       | TGCCTGGCCCTATTGTTACT    | CCCTATGCTGTTGTGGGACT    |
| CDH1 P                 | chr16:68737215+68737321       | GTGAACCCTCAGCCAATCAG    | TCACAGGTGCTTTGCAGTTC    |
| CDH1 +1 kb             | chr16:68738469+68738561       | AGAAATTGCACTCCCACACC    | GATCCCCAAATCTGCGTAAA    |
| CDH2 -1 kb             | chr18:27950018+27950116       | CAGCATGGAGGCACAGTCTA    | GAGCTTGCCTCTGGGAATTT    |
| CDH2 P                 | chr18:27951910+27952010       | GGCACATAAAATCCCAGTGC    | TGGGCTCAGAGGGAATATCA    |
| CDH2 +1 kb             | chr18:27951682+27951787       | TGGTCTCATCCCCAAGATA     | TGCTTCAACACGCTTTTGT     |
| VIM -1 kb              | chr10:17226963+17227105       | ATGCCTTGTCCTCCTTTTCC    | GTGTGCCTGGAACCCTTAGA    |
| VIM P                  | chr10:17228395+17228494       | GGCCCAGCTGTAAGTTGGTA    | CCTAGCGGTTTAGGGGAAAC    |
| VIM +1 kb              | chr10:17229220+17229290       | GAGGGGACCCTCTTTCCTAA    | GAGAGTGGCAGAGGACTGGA    |
| SNAI1 -1 kb            | chr20:49981560+49981683       | CGGCACCAAGTGAATAACA     | CACAGGTCTCACCGTTCTTG    |
| SNAI1 P                | chr20:49983118+49983246       | GCGAGCTGCAGGACTCTAAT    | GTGACTCGATCCTGGCTCA     |
| SNAI1 +1 kb            | chr20:49983626+49983698       | GGGGTCCTACGTGTGAGAGA    | TCCACAGGACAGACCAGGTT    |
| SNAI2 -1 kb            | chr8:48921418+48921537        | CCTTTACGAACTGAGCCCGT    | GTTCACAGCTGTCCCAGAGG    |
| SNAI2 P                | chr8:48921190+48921259        | TATGTGTGTCCAGTTCGCTGT   | CGCTCCTTCTGGTCAAGAA     |
| SNAI2 +1 kb            | chr8:48920720+48920855        | CGTCCCCATTGAGGAAGGAG    | TTAGAAGGCGGCTTGATGCA    |
